# Supplementary material for: Probing Lewis acidity of Y(BH4)3via its reactions with MBH4 (M = Li, Na, K, NMe4)
Source: Royal Society of Chemistry journal article supplement (doi:10.1039/c1dt10955c), 2011-01-01
Supplement: c1dt10955c.pdf [file c1dt10955c.pdf]

## ELECTRONIC SUPPLEMENTARY INFORMATION

### Probing Lewis acidity of $Y(BH_4)_3$ via its reactions with $MBH_4$ ( $M = Li, Na, K, NMe_4$ )

Tomasz Jaroń<sup>1,\*</sup> and Wojciech Grochala<sup>1,2\*\*</sup>

<sup>1</sup> Faculty of Chemistry, The University of Warsaw, Pasteura 1, 02093 Warsaw, Poland.

<sup>5</sup> <sup>2</sup> ICM, The University of Warsaw, Pawińskiego 5a, 02106 Warsaw, Poland.

\* e-mail: [tjaron@chem.uw.edu.pl](mailto:tjaron@chem.uw.edu.pl), \*\* e-mail: [wg22@cornell.edu](mailto:wg22@cornell.edu)

#### Contents:

1. Figure S1. Rietveld plot of  $KY(BH_4)_4$  refinement.
2. Figure S2. Rietveld plot of  $(CH_3)_4NY(BH_4)_4$  refinement.
- 10 3. Table S3. Interatomic distances in  $KY(BH_4)_4$  crystal.
4. Table S4. Interatomic distances in  $(CH_3)_4NY(BH_4)_4$  crystal.
5. Table S5. Comparison of the ranges of bond lengths and angles in selected borohydrides.
6. Introduction to the FTIR spectra of  $Y(BH_4)_3/MBH_4$  composites.
7. Figure S6. Infrared spectra of  $Y(BH_4)_3 + MBH_4$  composites.
- 15 8. Table S7. Infrared absorption bands in the synthesised Y compounds compared with their Sc analogues.
9. Figure S8. Temperature-resolved FTIR spectrum of the gases evolved during the thermal decomposition process of  $(CH_3)_4NY(BH_4)_4$ .
10. Figure S9. MS of the gases evolved in the thermal decomposition of  $(CH_3)_4NY(BH_4)_4$ .
- 20 11. Figure S10. Temperature-resolved FTIR spectrum of the gases evolved during the thermal decomposition process of  $(CH_3)_4NBH_4$ .
12. Figure S11. MS of the gases evolved in the thermal decomposition of  $(CH_3)_4NBH_4$ .
13. Figure S12. PXD of the thermal decomposition products of  $(CH_3)_4NY(BH_4)_4$ .
14. Figure S13. Temperature-resolved FTIR spectrum of the gases evolved during the thermal decomposition of  $KY(BH_4)_4$ .
- 25 15. Figure S14. Temperature-resolved MS of the gases evolved in the thermal decomposition of  $KY(BH_4)_4$ .
16. Figure S15. TGA and DSC profiles of  $KBH_4$  milled for 1 h.
17. Figure S16. TGA and DSC profiles of  $3KBH_4 + YCl_3$  milled for 1 h.

18. Figure S17. FTIR spectra of  $KY(BH_4)_4$  thermal decomposition products at RT, (b) heated to 210 °C and cooled to RT, (c) heated to 295 °C and cooled to RT, (d) heated to 410 °C and cooled to RT, (e)  $KBH_4$ , (f)  $YH_x$ .

19. Figure S18. TGA and DSC profiles of  $KBH_4$  milled for 1 h.

5 20. Figure S19. Rietveld plot of  $Y(BH_4)_3 + NaBH_4 + 3 LiCl$  composite measured at 171 °C.

21. Figure S20. Rietveld plot of  $Y(BH_4)_3 + NaBH_4 + 3 LiCl$  composite heated to 200 °C (5 K/min) and rapidly quenched (50 K/min); PXD measured at RT.

22. Figure S21. PXD pattern of  $Y(BH_4)_3 + NaBH_4 + 3 LiCl$  composite at 400 °C.

10 23. Figure S22. PXD pattern of  $Y(BH_4)_3 + LiBH_4 + 3 LiCl$  composite heated to 210 °C and quickly quenched to room temperature.

24. Figure S23. PXD pattern of  $KY(BH_4)_3 + 3 LiCl$ : (a) sample heated to 210 °C and quickly quenched to room temperature (black, top curve), measured for 17 h at room temperature; (b) measured at 200 °C for 5.5 h.

15

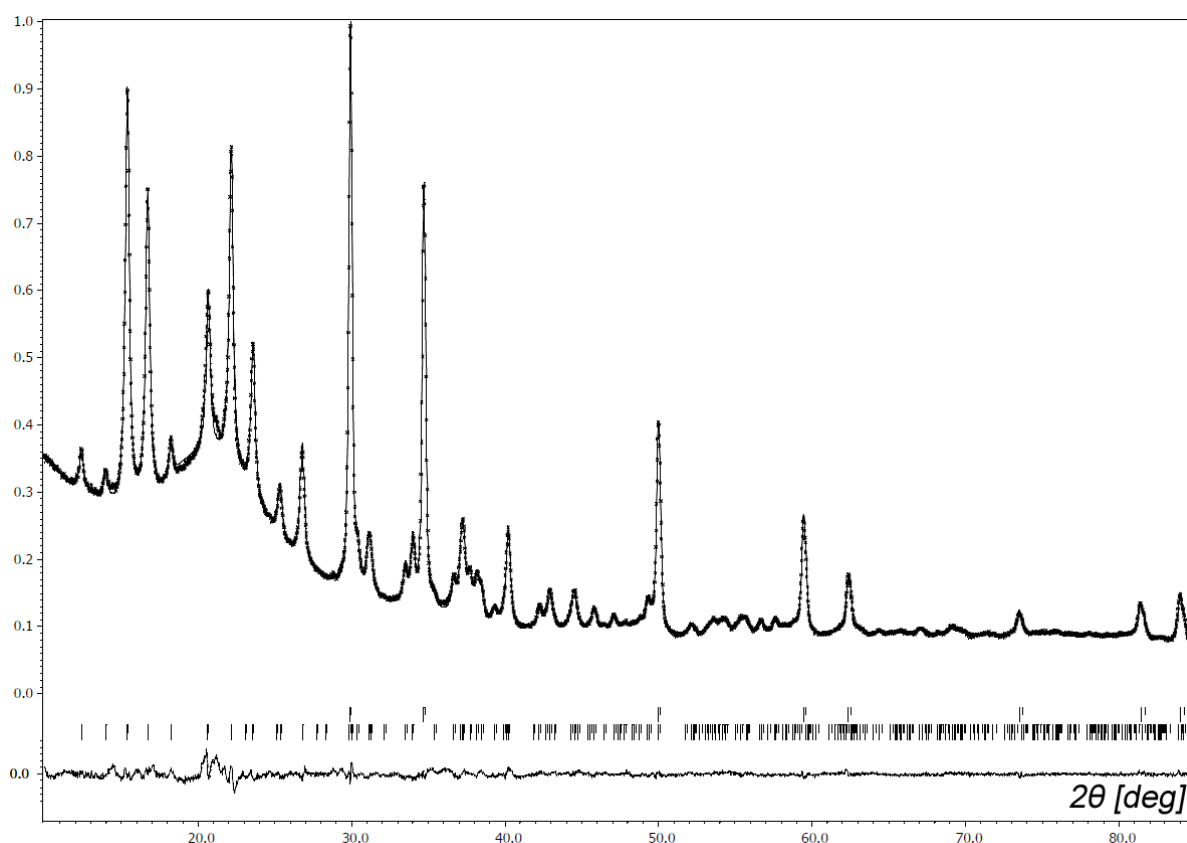

Figure S1. Rietveld plot from structure refinement of  $KY(BH_4)_4$ .

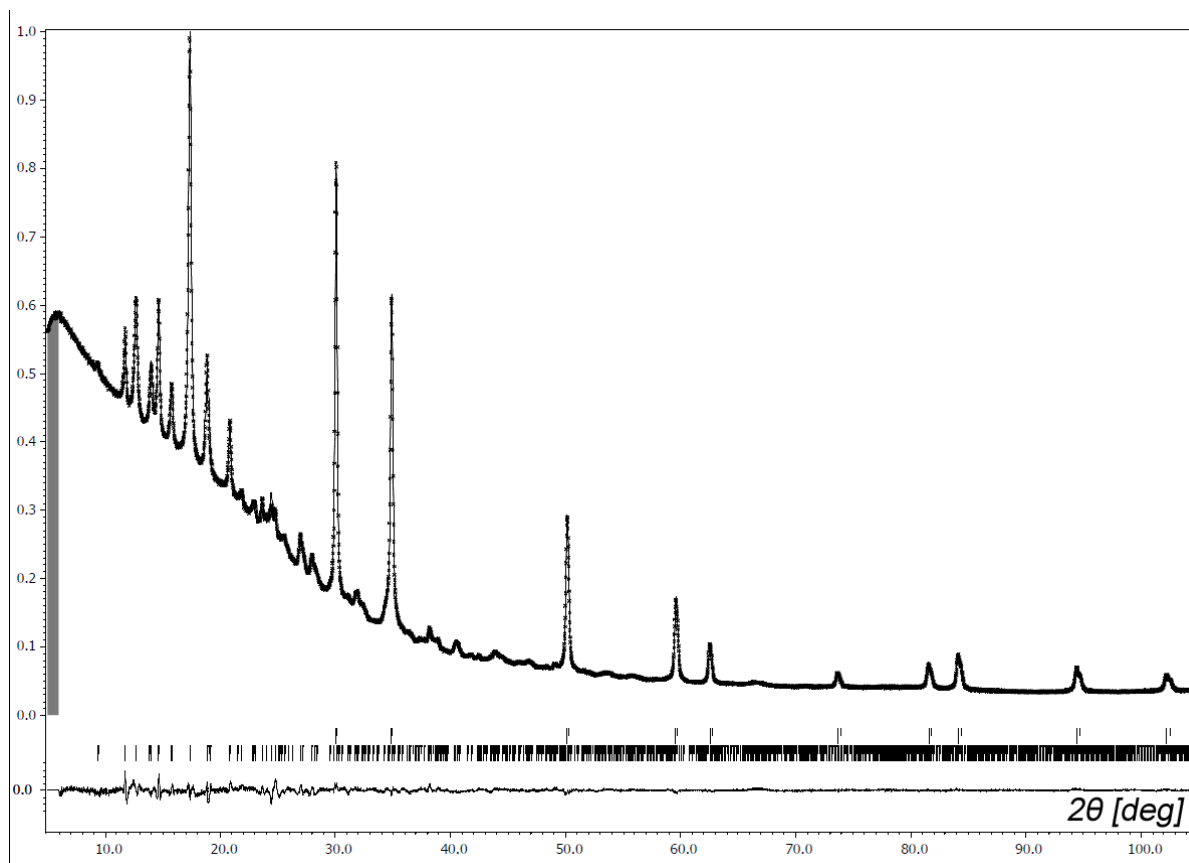

Figure S2. Rietveld plot from structure refinement of  $(\text{CH}_3)_4\text{NY}(\text{BH}_4)_4$ .

Table S3. Interatomic distances in  $\text{KY}(\text{BH}_4)_4$  crystal.

| $\text{KY}(\text{BH}_4)_4$                                           | PXD         |
|----------------------------------------------------------------------|-------------|
| $(\text{B} - \text{H})_{\text{min}}$                                 | 1.12(4)     |
| $(\text{B} - \text{H})_{\text{max}}$                                 | 1.12(4)     |
| $(\text{H} - \text{B} - \text{H})_{\text{min}}$                      | 109(4)      |
| $(\text{H} - \text{B} - \text{H})_{\text{max}}$                      | 109(4)      |
| $(\text{Y} - \text{H})_{\text{min}}$                                 | 2.20(3)     |
| $(\text{Y} - \text{H})_{\text{max}}$                                 | 2.41(4)     |
| <b><math>(\text{Y} - \text{H})_{\text{averag.}} \times 12</math></b> | <b>2.29</b> |
| $(\text{Y} - \text{B})_{\text{min}}$                                 | 2.362(9)    |
| $(\text{Y} - \text{B})_{\text{max}}$                                 | 2.448(10)   |

|                                       |              |
|---------------------------------------|--------------|
| <b>(Y – B)<sub>averag.</sub> x 4</b>  | <b>2.405</b> |
| (B – Y – B) <sub>min</sub>            | 108.44(16)   |
| (B – Y – B) <sub>max</sub>            | 112.3(4)     |
| (K – H) <sub>min</sub>                | 2.60(4)      |
| <b>(K – H)<sub>averag.</sub> x 6</b>  | <b>2.76</b>  |
| (K – H) <sub>max</sub>                | 3.37(3)      |
| <b>(K – H)<sub>averag.</sub> x 12</b> | <b>3.34</b>  |
| <b>(K – H)<sub>overall</sub> x 18</b> | <b>3.147</b> |
| (K – B) <sub>min</sub>                | 3.259(10)    |
| (K – B) <sub>max</sub>                | 3.354(7)     |
| <b>(K – B)<sub>averag.</sub> x 6</b>  | <b>3.32</b>  |
| (B – K – B) <sub>min</sub>            | 87.21(17)    |
| (B – K – B) <sub>max</sub>            | 92.79(17)    |

Table S4. Interatomic distances in  $(\text{CH}_3)_4\text{NY}(\text{BH}_4)_4$  crystal; results from periodic DFT calculations and PXD Rietveld refinement.

| <b><math>(\text{CH}_3)_4\text{NY}(\text{BH}_4)_4</math></b> | <b>DFT</b>   | <b>PXD</b>   |
|-------------------------------------------------------------|--------------|--------------|
| (B – H) <sub>min</sub>                                      | 1.206        | 1.15(6)      |
| (B – H) <sub>max</sub>                                      | 1.251        | 1.15(6)      |
| (H – B – H) <sub>min</sub>                                  | 105.68       | 109(5)       |
| (H – B – H) <sub>max</sub>                                  | 112.54       | 109(5)       |
| (Y – H) <sub>min</sub>                                      | 2.281        | 2.29(3)      |
| (Y – H) <sub>max</sub>                                      | 2.313        | 2.318(9)     |
| <b>(Y – H)<sub>averag.</sub> x 12</b>                       | <b>2.296</b> | <b>2.296</b> |
| (Y – B) <sub>min</sub>                                      | 2.447        | 2.394(11)    |

|                                     |              |              |
|-------------------------------------|--------------|--------------|
| $(Y - B)_{\max}$                    | 2.471        | 2.430(9)     |
| $(Y - B)_{\text{averag.} \times 4}$ | <b>2.454</b> | <b>2.407</b> |
| $(B - Y - B)_{\min}$                | 107.46       | 107.5(6)     |
| $(B - Y - B)_{\max}$                | 111.19       | 115.5(4)     |
| $(N - B)_{\min}$                    | 4.268        | 4.400(19)    |
| $(N - B)_{\max}$                    | 5.028        | 5.043(12)    |
| $(N - B)_{\text{averag.} \times 9}$ | <b>4.743</b> | <b>4.770</b> |
| $(N - Y)_{\min}$                    | 5.616        | 5.804(7)     |
| $(N - Y)_{\max}$                    | 6.150        | 6.037(8)     |
| $(N - Y)_{\text{averag.} \times 6}$ | <b>5.920</b> | <b>5.904</b> |

Table S5. Comparison of the ranges of bond lengths and angles in selected borohydrides. Units:  $V_m$  (molar volume) [ $\text{\AA}^3$ ], distances [ $\text{\AA}$ ], angles [ $^\circ$ ].

| Value or range               | Quasi-binary borohydrides                            |                                                                            |                                                                             | Quasi-ternary Sc borohydrides                                            |                                                                         |                                                                        | Quasi-ternary Y borohydrides       |                                                   |
|------------------------------|------------------------------------------------------|----------------------------------------------------------------------------|-----------------------------------------------------------------------------|--------------------------------------------------------------------------|-------------------------------------------------------------------------|------------------------------------------------------------------------|------------------------------------|---------------------------------------------------|
|                              | $\text{KBH}_4$<br>Fm-<br>3m<br>Bookmark not defined. | $(\text{CH}_3)_4\text{NBH}_4$<br>P4/nmm<br>Error!<br>Bookmark not defined. | LT-<br>$\text{Y}(\text{BH}_4)_3$<br>Pa-3<br>Error!<br>Bookmark not defined. | $\text{LiSc}(\text{BH}_4)_4$<br>P-42c<br>Error!<br>Bookmark not defined. | $\text{NaSc}(\text{BH}_4)_4$<br>Cmcm<br>Error!<br>Bookmark not defined. | $\text{KSc}(\text{BH}_4)_4$<br>Pnma<br>Error!<br>Bookmark not defined. | $\text{KY}(\text{BH}_4)_4$<br>Cmcm | $(\text{CH}_3)_4\text{NY}(\text{BH}_4)_4$<br>Pnma |
| $V_m$                        | 76.1                                                 | 177.1                                                                      | 159.8                                                                       | 222.2                                                                    | 218.7                                                                   | 234.1                                                                  | 256.4                              | 386.6                                             |
| Wt. % H*                     | 7.5                                                  | 4.5                                                                        | 9.1                                                                         | 14.5                                                                     | 12.7                                                                    | 11.2                                                                   | 8.6                                | 7.2                                               |
| $M^I\text{-H}^{**}$          | 2.877(11)                                            | 3.90(5)–<br>5.91(4)                                                        | —                                                                           | 1.98(8)–<br>2.5(1)                                                       | 2.33(1)–<br>3.34(1)                                                     | 2.58(7)–<br>3.69(12)                                                   | 2.60(4)–<br>3.37(3)                | 3.899(8)–5.957(12)                                |
| $M^I\text{-B}^{**}$          | 3.3640(6)                                            | 4.533(6)–<br>5.246(8)                                                      | —                                                                           | 2.54(1)                                                                  | 2.94(1)–<br>3.22(1)                                                     | 3.51(4)–<br>3.95(2)                                                    | 3.259(10)–<br>3.354(7)             | 4.400(19)–<br>5.043(12)                           |
| $B\text{-}M^I\text{-}B^{**}$ | 90                                                   | 70.25(17)–<br>121.57(19)                                                   | —                                                                           | 73.0(3)–<br>101.257(15)                                                  | 87.76(2)–<br>92.24(2)                                                   | 57.3(4)–<br>111.8(4)                                                   | 87.21(17)–<br>92.79(17)            | 49.09(16)–122.4(3)                                |
| $M^{III}\text{-H}$           | —                                                    | —                                                                          | 2.229(8)–<br>2.334(7)                                                       | 1.92(5)–<br>2.55(8)                                                      | 2.15(2)–<br>2.17(2)                                                     | 2.0(1)–<br>2.4(1)                                                      | 2.20(3)–<br>2.41(4)                | 2.29(3)–2.318(9)                                  |
| $M^{III}\text{-B}$           | —                                                    | —                                                                          | 1.176(10)–<br>1.235(9)                                                      | 2.28(1)                                                                  | 2.27(1)–<br>2.50(1)                                                     | 2.27(2)–<br>2.38(3)                                                    | 2.362(9)–<br>2.448(10)             | 2.394(11)–<br>2.430(9)                            |
| $B\text{-}M^{III}\text{-}B$  | —                                                    | —                                                                          | 78.6(2)–<br>105.0(2)                                                        | 95.5(14)–<br>114.9(5)                                                    | 96.5(5)–<br>125.4(5)                                                    | 108.9(5)–<br>110.6(6)                                                  | 108.44(16)–<br>112.3(4)            | 107.5(6)– 115.5(4)                                |

5 (\*) wt. % of H in pure compound; (\*\*)  $M^I$  corresponds to N atom for  $(\text{CH}_3)_4\text{N}$  salts.

### Infrared spectra of $Y(BH_4)_3/MBH_4$ composites.

The vibrational spectra of  $KY(BH_4)_4$  and  $(CH_3)_4NY(BH_4)_4$  confirm structural aspects described earlier. The B–H stretching ( $\nu_{BH} = 2100\text{--}2600\text{ cm}^{-1}$ ) and H–B–H deformation ( $\delta_{HBH} = 1050\text{--}1400\text{ cm}^{-1}$ ) absorption bands are very similar to those for analogous scandium compounds,  $MSc(BH_4)_4$ , and characteristic for tridentate  $BH_4^-$  group.<sup>1</sup> The  $\nu_{BH}$  bands are split into two groups, around  $2475\text{ cm}^{-1}$  and  $2150\text{--}2300\text{ cm}^{-1}$ , which has been assigned to stretching of the terminal hydrogen–B and bridging hydrogen–B bonds, respectively. The most important IR bands of these two compounds are summarised and compared with those for Sc borohydrides in *Tab S3*.

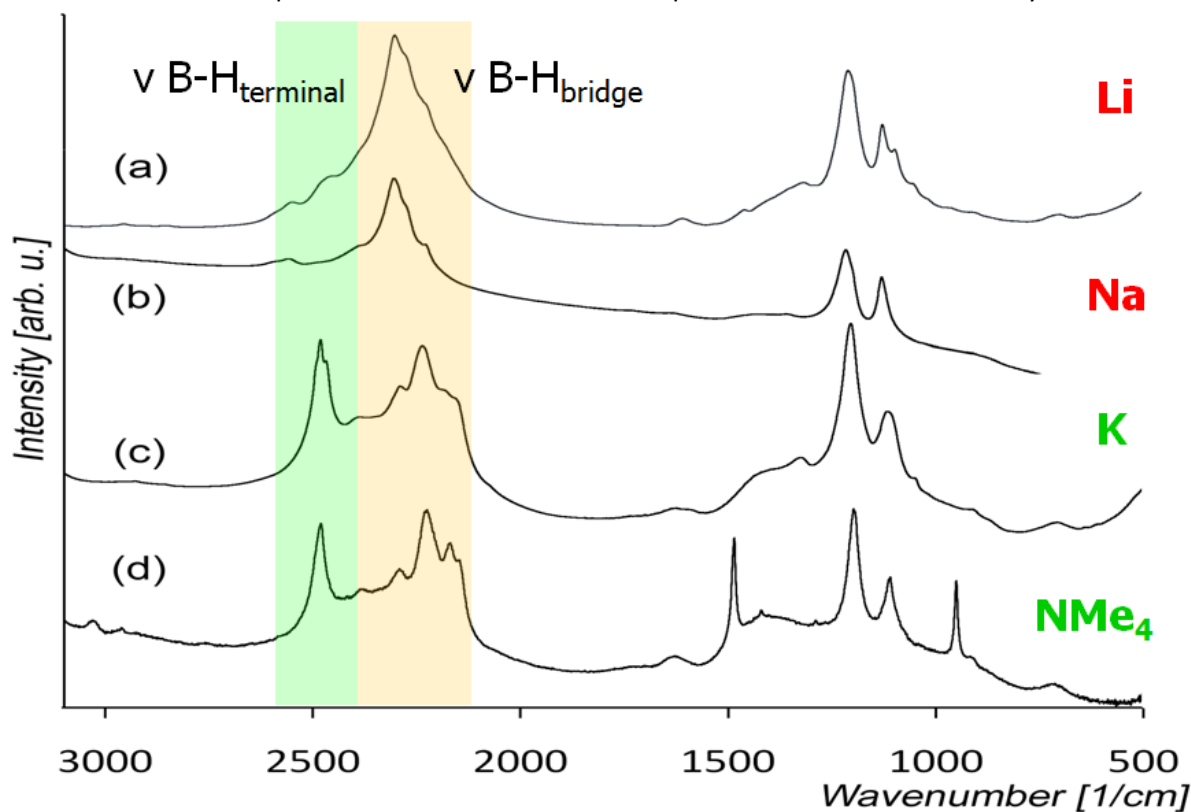

Figure S6. Infrared spectra of  $Y(BH_4)_3 + MBH_4$  composites.  $MBH_4 =$  (a)  $LiBH_4$ , (b)  $NaBH_4$ , (c)  $KBH_4$ , (d)  $(CH_3)_4NBH_4$ .

Table S7. The most important infrared absorption bands in the as-synthesised Y compounds compared with Sc analogues. vs – very strong, s – strong, w – weak, vw – very weak, sh – shoulder.

| $LiSc(BH_4)_4$ | $NaSc(BH_4)_4$ | $KY(BH_4)_3$       | $KSc(BH_4)_4$   | $(CH_3)_4NY(BH_4)_4$ | Assignment                      |
|----------------|----------------|--------------------|-----------------|----------------------|---------------------------------|
| P-42c          | Cmcm           | Cmcm               | Pnma            | Pnma                 |                                 |
|                |                |                    |                 | 3032 w<br>2964 vw    | C-H stretching                  |
| 2468           | 2486<br>2461   | 2482 vs<br>2468 sh | 2506 sh<br>2485 | 2480 vs              | B- $H_{terminal}$<br>stretching |

|         |         |         |                    |         |                                        |
|---------|---------|---------|--------------------|---------|----------------------------------------|
| 2259    |         | 2290    |                    | 2291    |                                        |
| 2240    | 2240    | 2236 vs | 2288               | 2227 vs | B-H <sub>bridge</sub> stretching       |
| 2199    | 2160    | 2183 sh | 2223               | 2170    |                                        |
| 2121 w  |         | 2156 sh |                    | 2148 sh |                                        |
| -       | -       | -       | -                  | 1484 s  |                                        |
|         |         |         |                    | 1418 vw | H-C-H deformations                     |
| 1325    | 1340    | 1324    | 1337 w             | 1288 vw | H-B-H <sub>terminal</sub> deformations |
| 1194 vs | 1189 vs | 1203 vs | 1188 vs            | 1196 vs | H-B-H <sub>bridge</sub> deformations   |
| 1113    |         | 1114 s  | 1121               |         | H-B-H deformations                     |
| 1071 w  | 1105    | 1050 sh | 1109 sh<br>1091 sh | 1109 s  |                                        |
| -       | -       | -       | -                  | 949 s   | NC <sub>4</sub> breathing              |
|         |         |         |                    | 912 vw  |                                        |

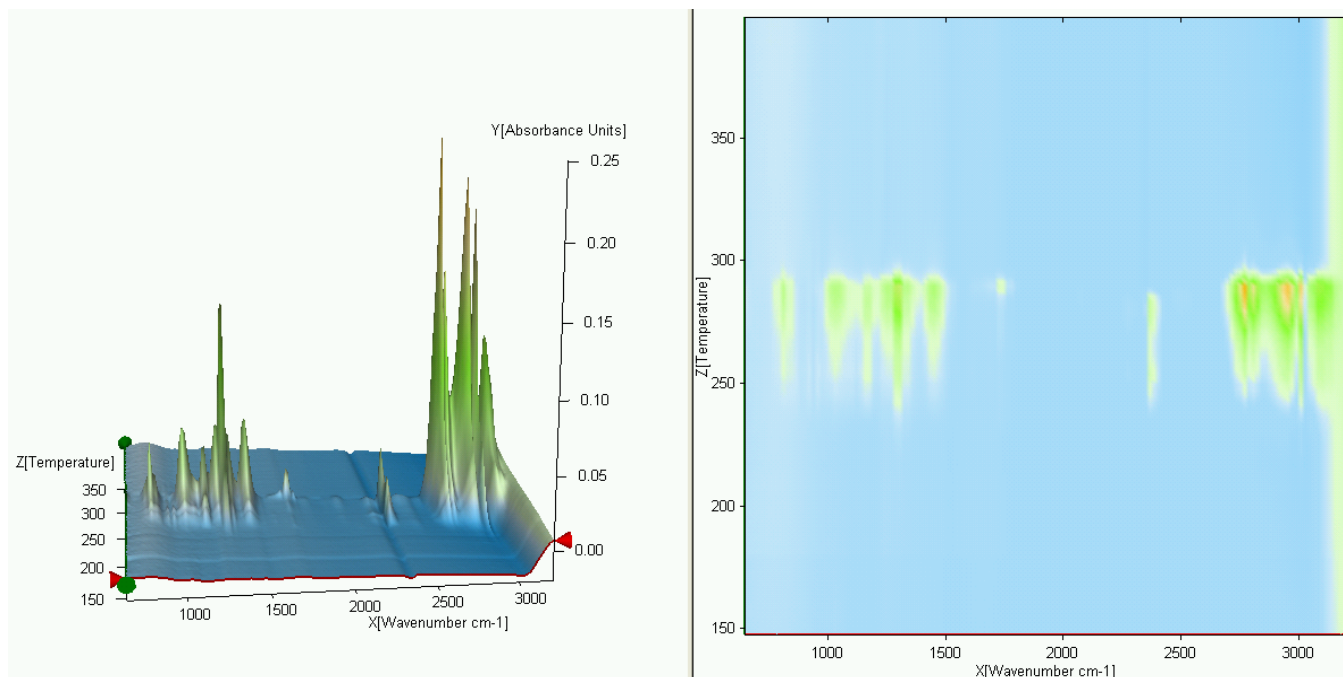

Figure S8. Temperature-resolved FTIR spectrum of the gases evolved during the thermal decomposition of  $(\text{CH}_3)_4\text{NY}(\text{BH}_4)_4$  (5 K/min).

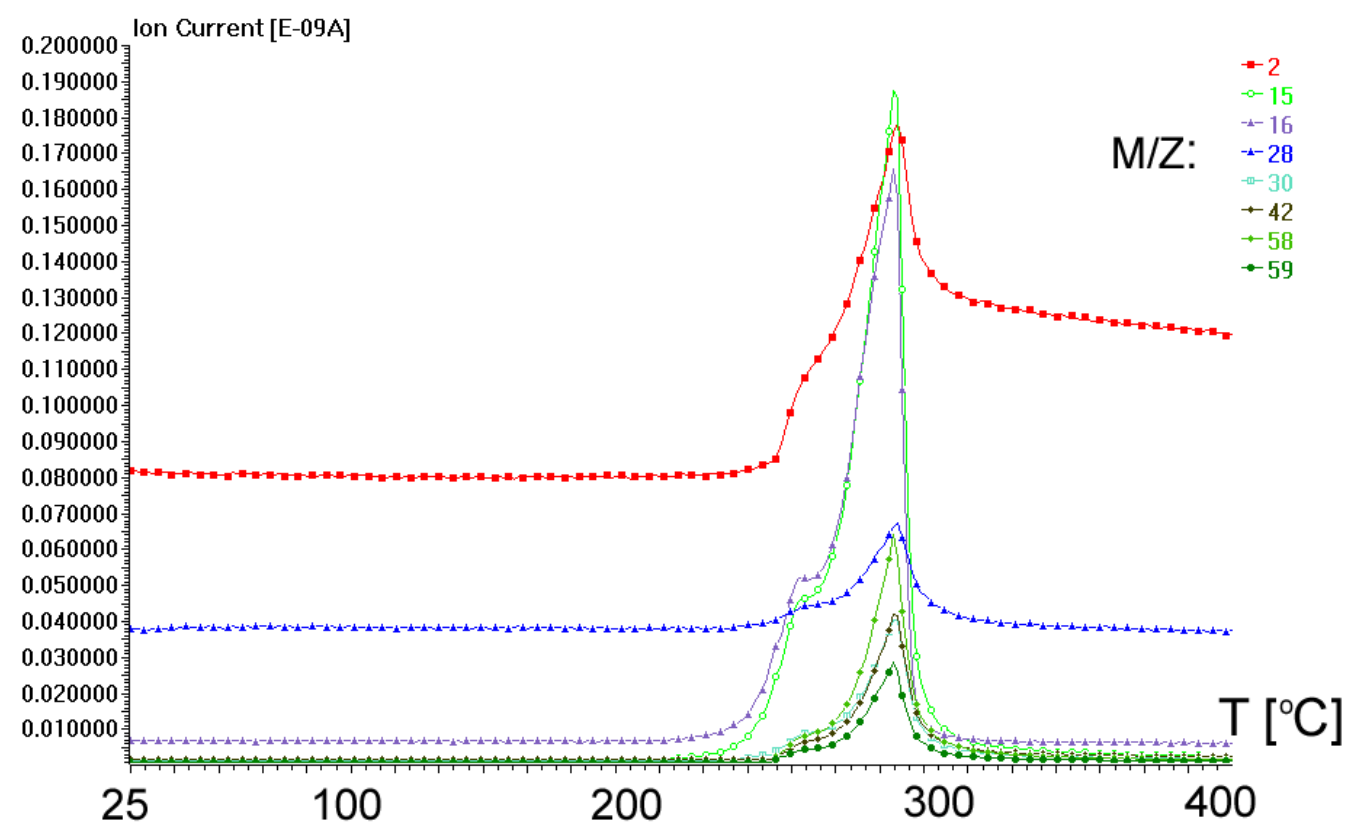

Figure S9. MS of the gases evolved in the thermal decomposition of  $(\text{CH}_3)_4\text{NY}(\text{BH}_4)_4$  (5 K/min). Only the most important M/Z are shown.



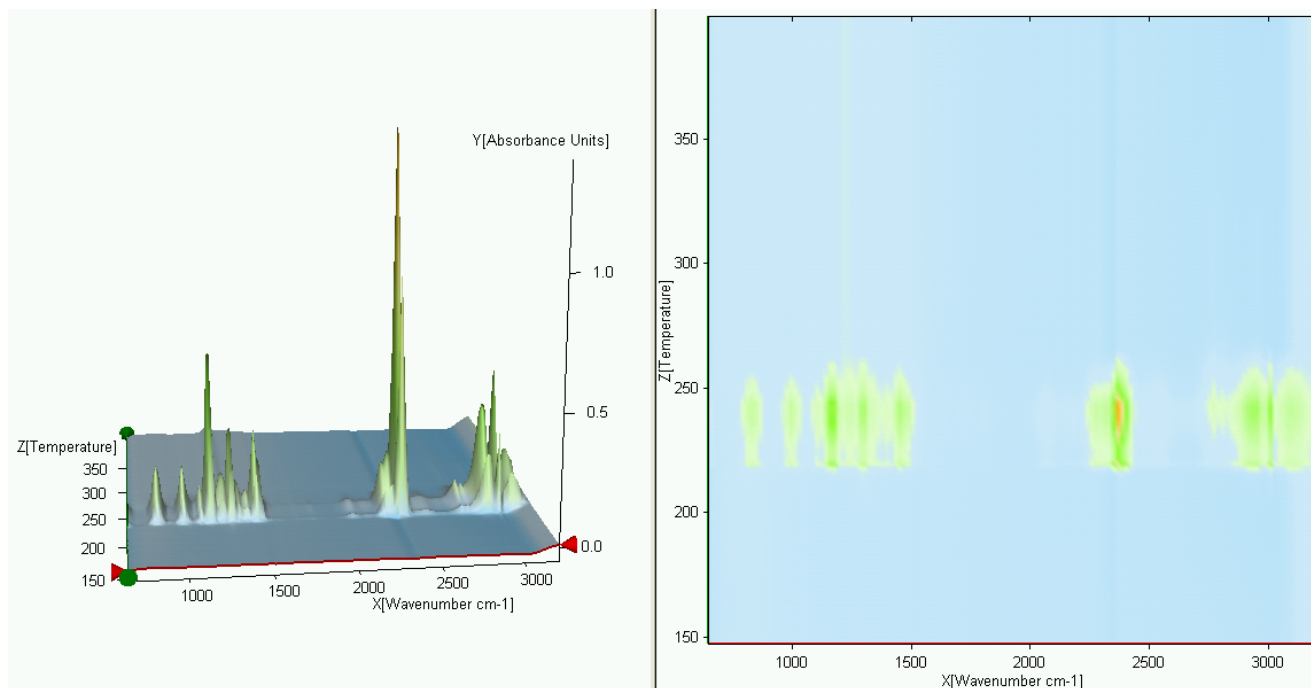

Figure S10. Temperature-resolved FTIR spectrum of the gases evolved during the thermal decomposition of  $(\text{CH}_3)_4\text{NBH}_4$  (5 K/min).

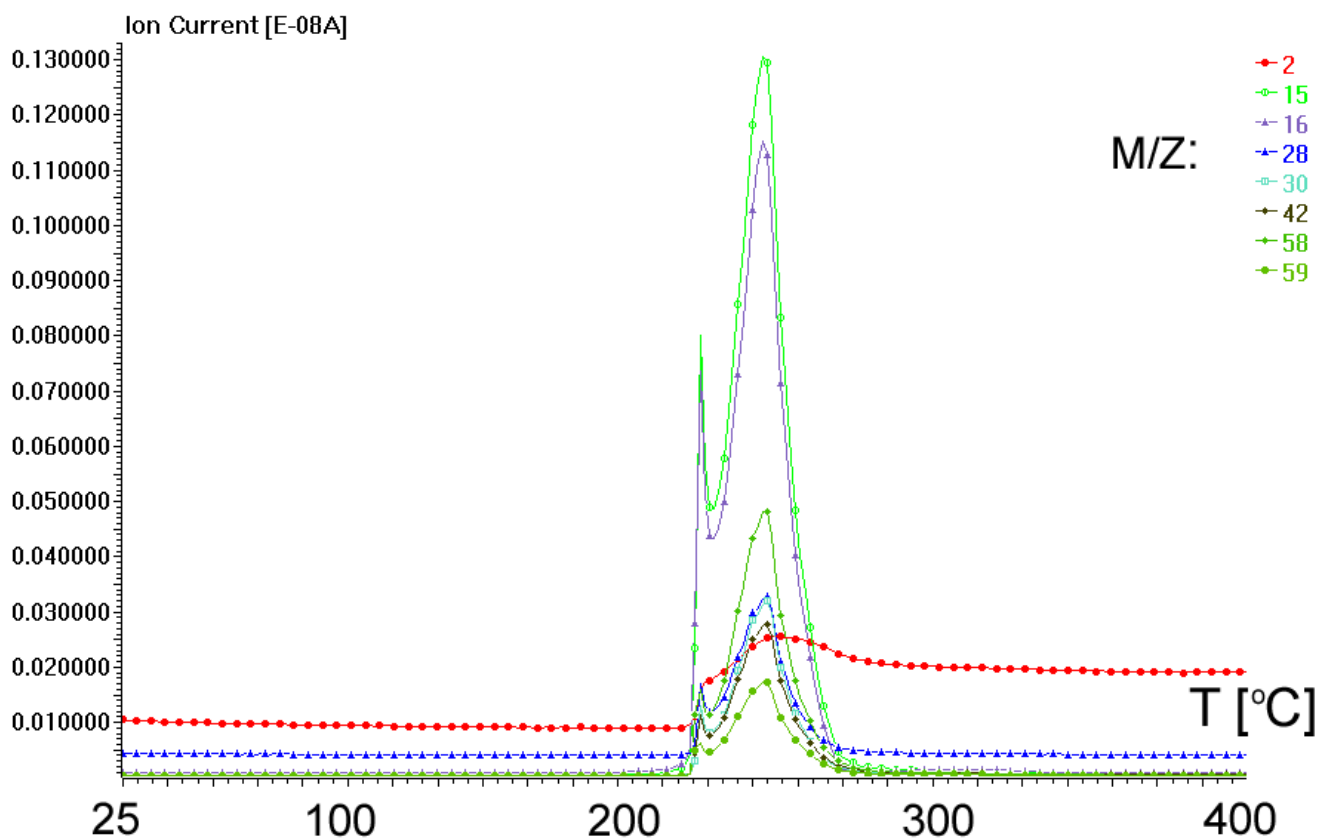

Figure S11. MS of the gases evolved in the thermal decomposition of  $(\text{CH}_3)_4\text{NBH}_4$  (5 K/min). Only the most important M/Z are shown.

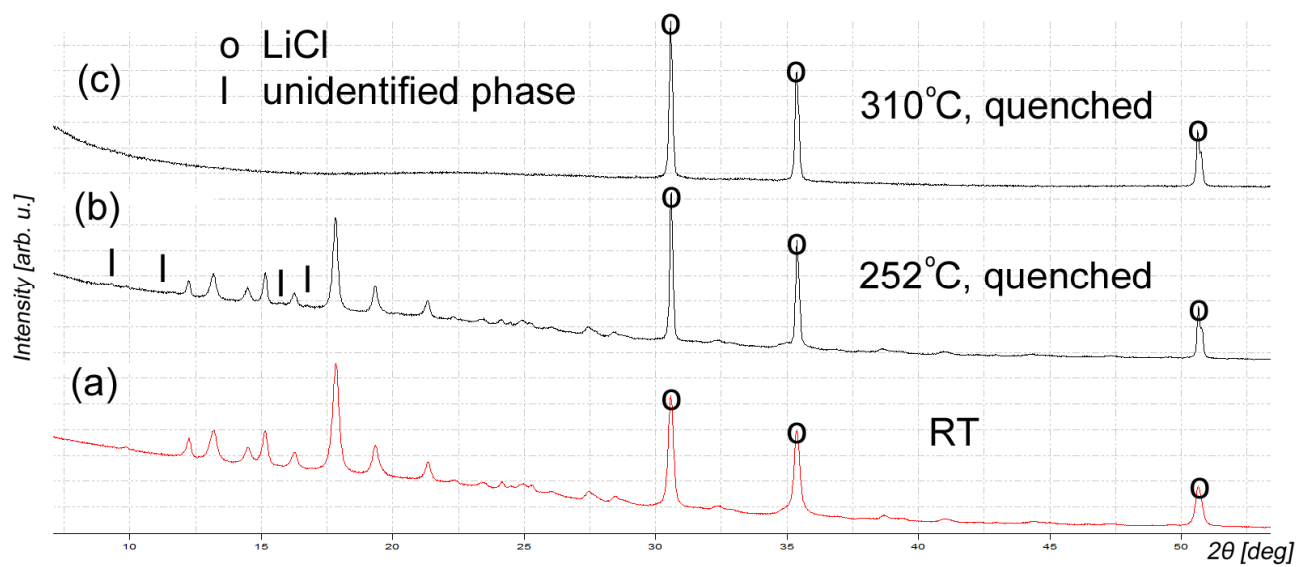

Figure S12. PXD of the thermal decomposition products of  $(\text{CH}_3)_4\text{NY}(\text{BH}_4)_4$ . The unmarked reflexes come from  $(\text{CH}_3)_4\text{NY}(\text{BH}_4)_4$ .

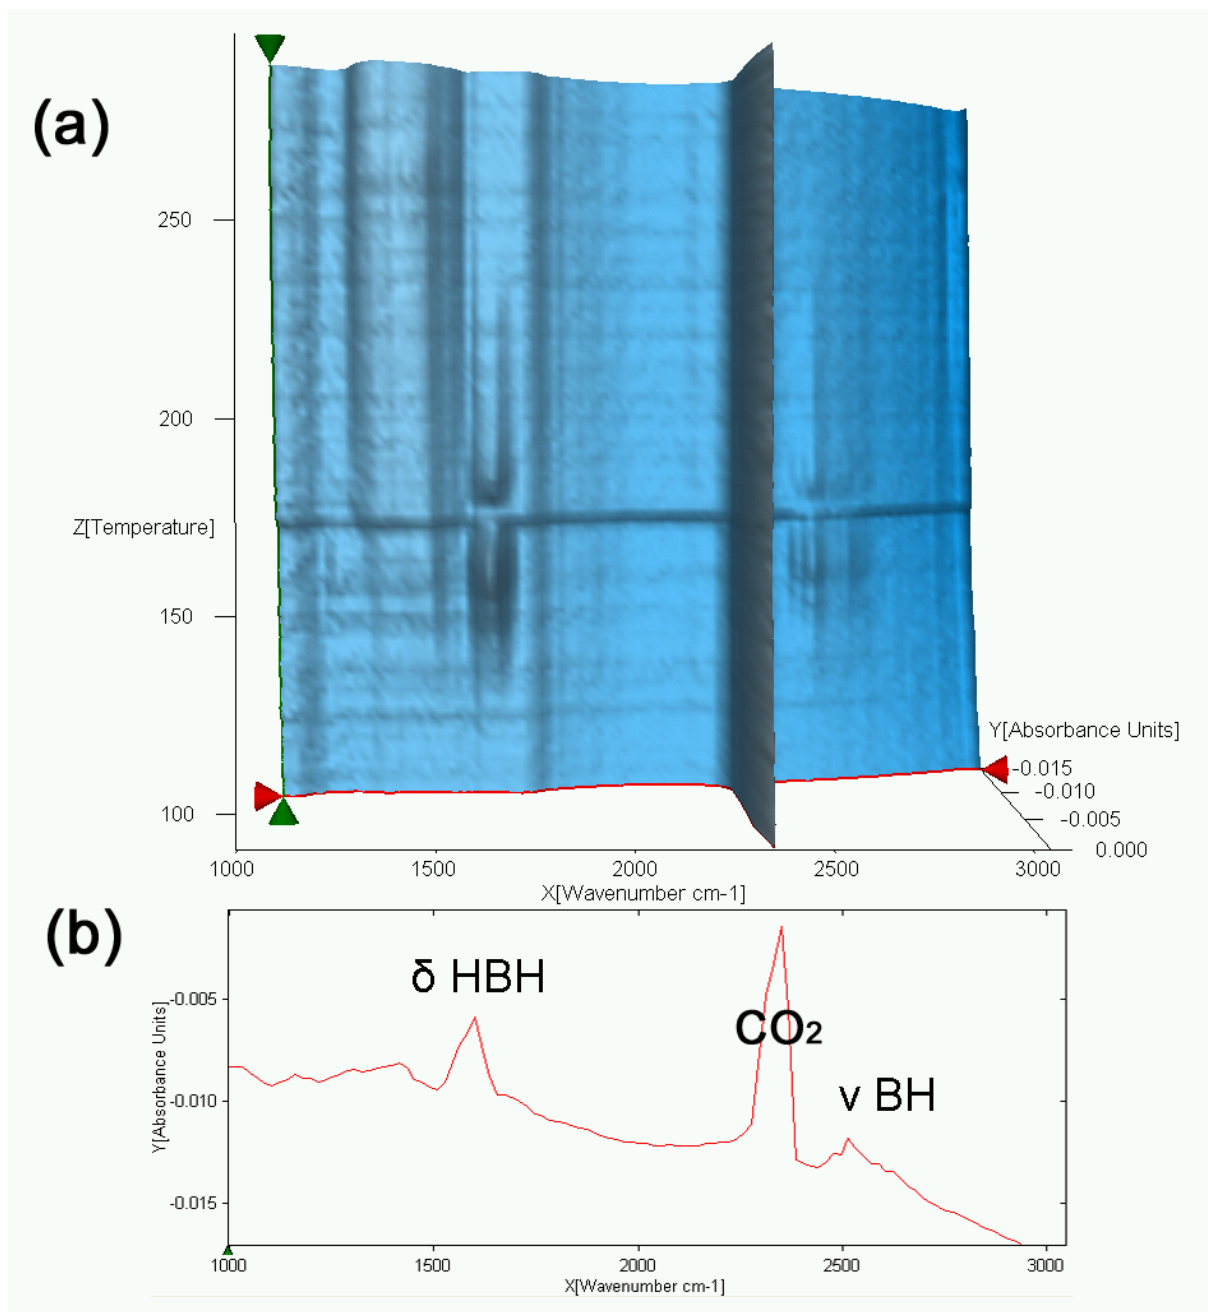

Figure S13. (a) Temperature-resolved FTIR spectrum of the gases evolved during the thermal decomposition of  $KY(BH_4)_4$ , (b) the single spectrum at a maximum  $B_xH_y$  emission ( $T = ca. 160^\circ C$ ).  $CO_2$  present in the atmosphere of the spectrometer (but not inside the gas cell) has not been completely compensated.

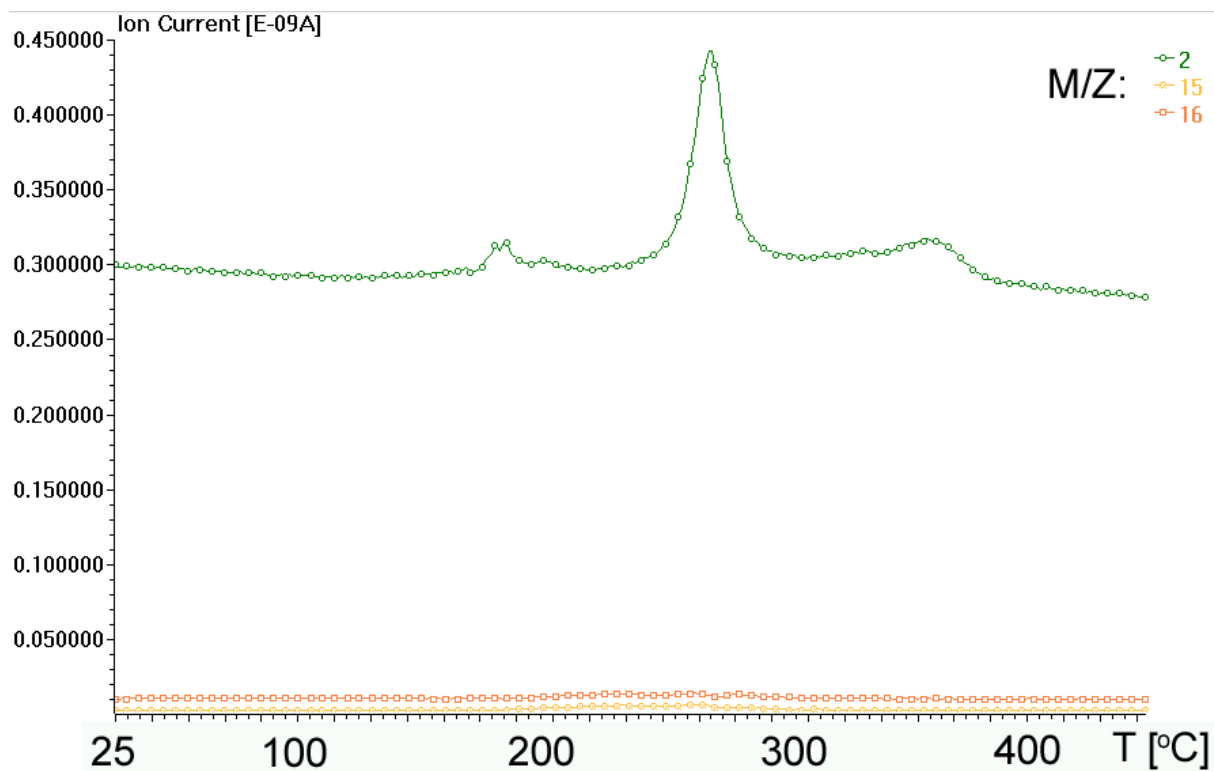

Figure S14. MS of the gases evolved in the thermal decomposition of  $K Y(BH_4)_4$  (5 K/min). Only the most important M/Z are shown.

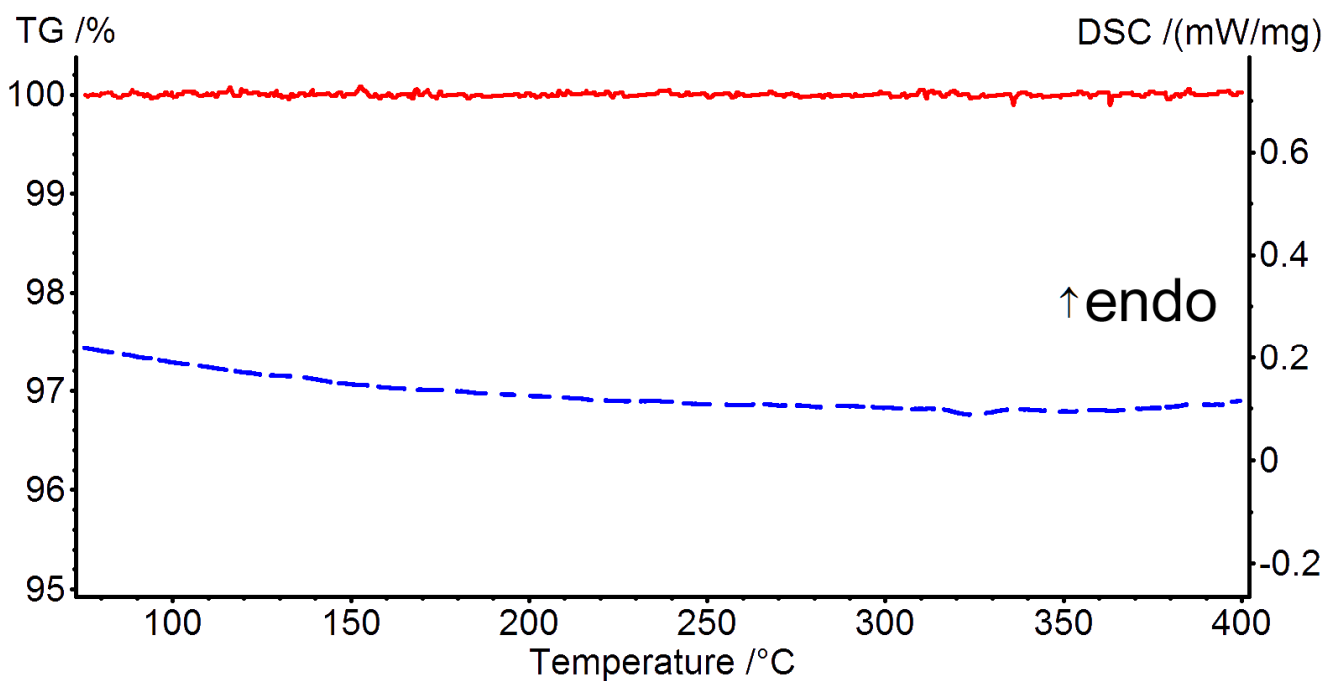

Figure S15. TGA (red, full line) and DSC (blue, dashed line) curves of  $KBH_4$  milled for 1 h (5 K/min).

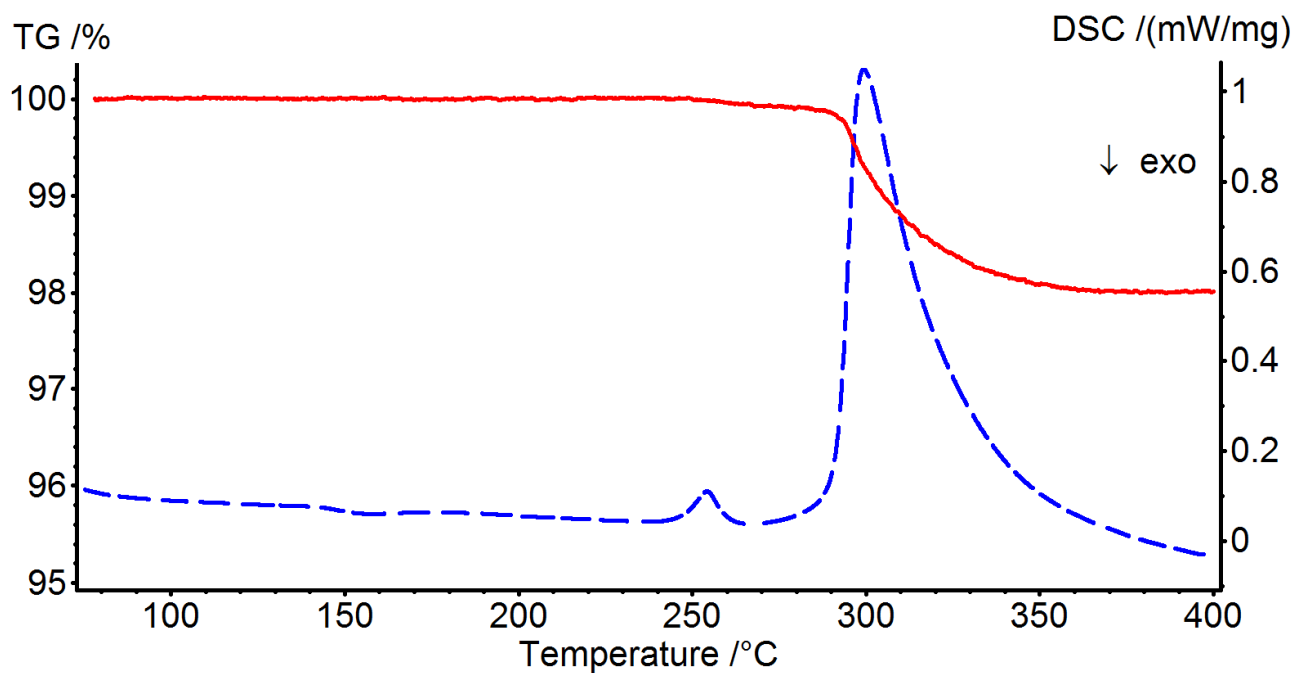

Figure S16. TGA (red, full line) and DSC (blue, dashed line) curves of  $3\text{KBH}_4 + \text{YCl}_3$  milled for 1 h (5 K/min).

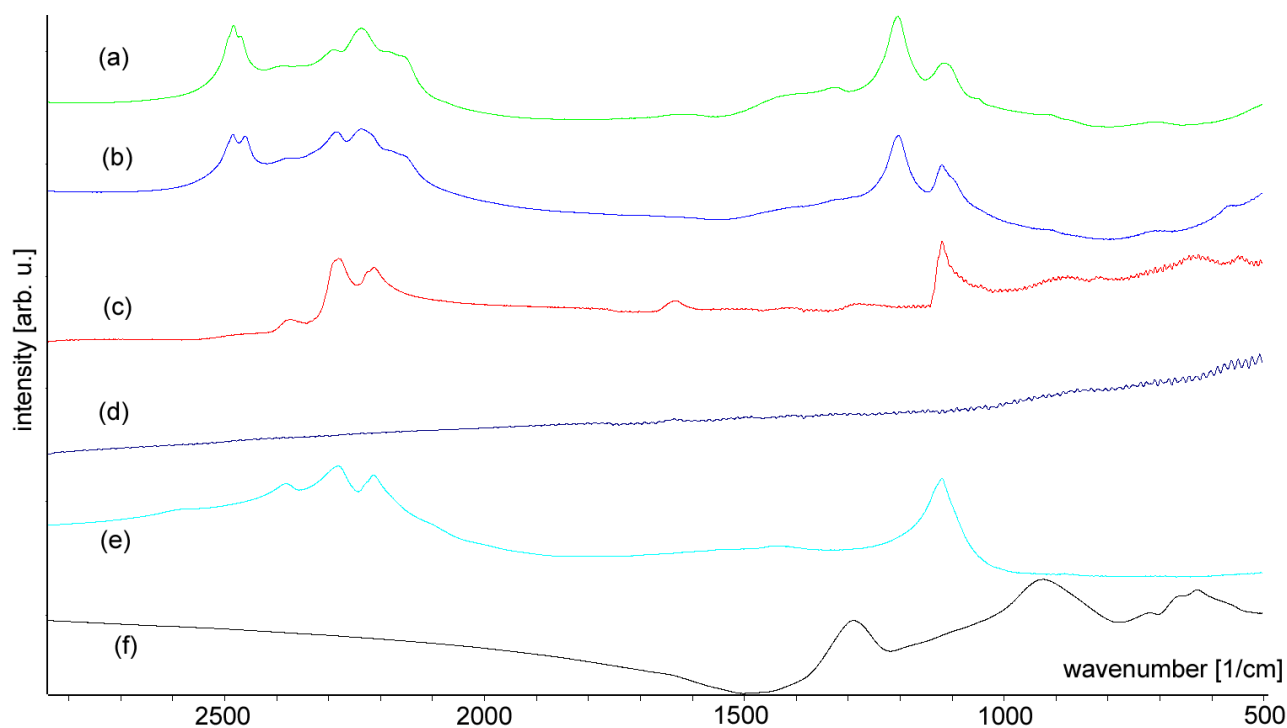

Figure S17. FTIR spectra of  $\text{KY}(\text{BH}_4)_4$  thermal decomposition products: (a) as synthesised, (b) heated to  $210^\circ\text{C}$  and cooled to RT, (c) heated to  $295^\circ\text{C}$  and cooled to RT, (d) heated to  $410^\circ\text{C}$  and cooled to RT, (e)  $\text{KBH}_4$ , (f)  $\text{YH}_x$ .<sup>2</sup>

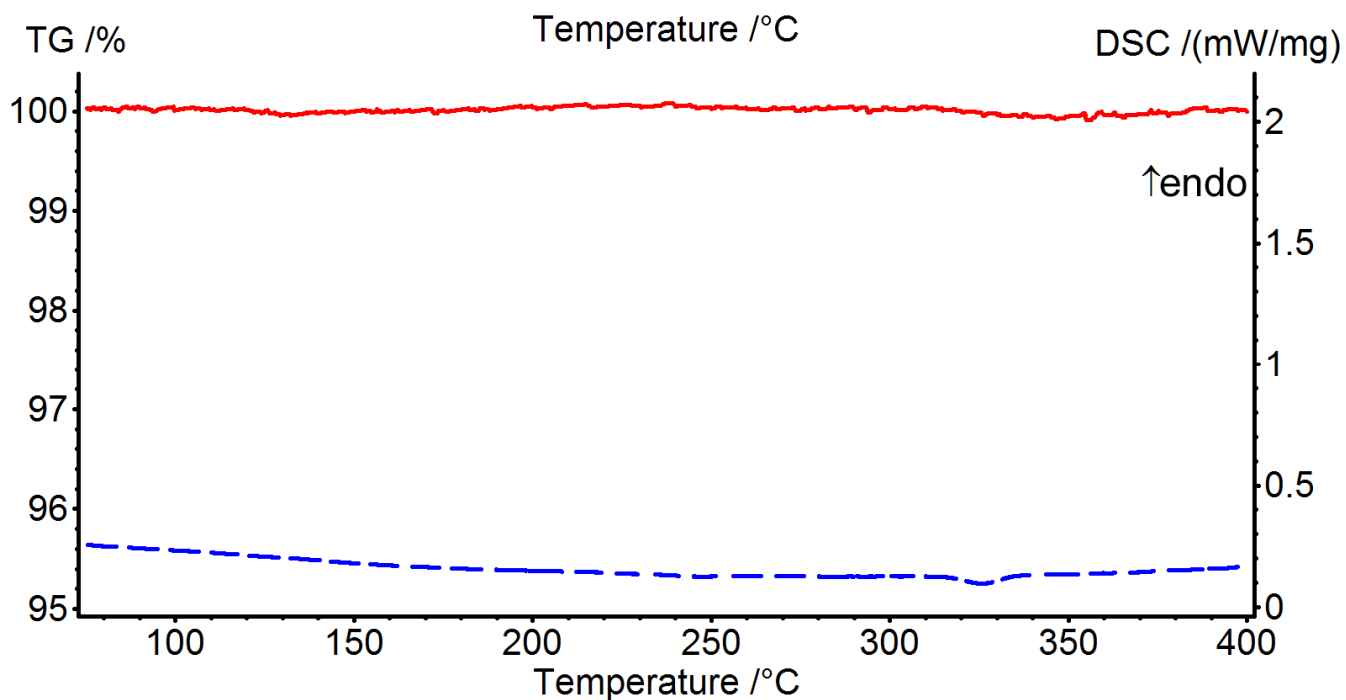

Figure S18. TGA (red, full line) and DSC (blue, dashed line) curves of  $\text{NaBH}_4$  milled for 1 h (5 K/min).

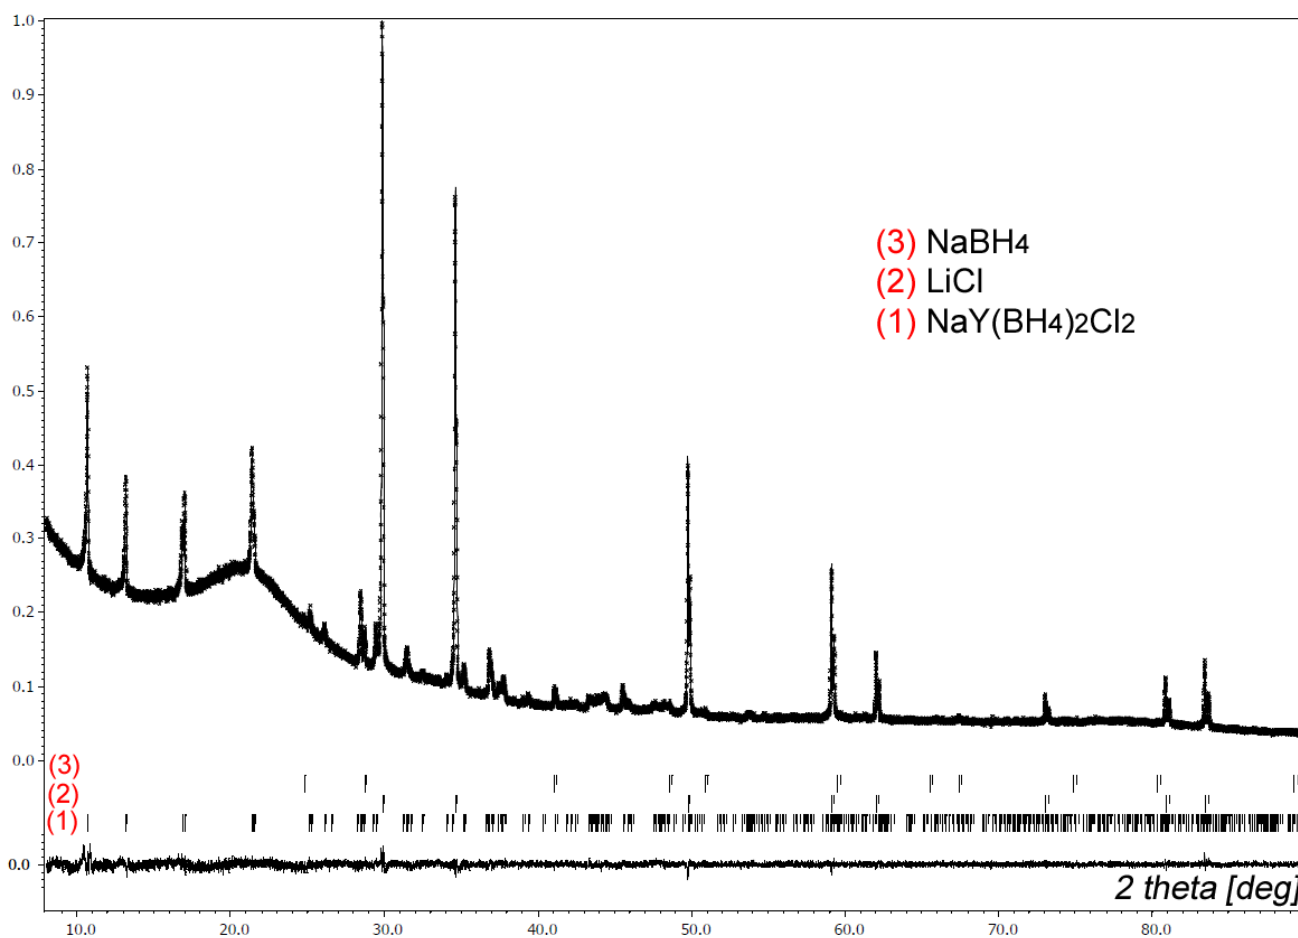

Figure S19. Rietveld plot of  $\text{Y}(\text{BH}_4)_3 + \text{NaBH}_4 + 3 \text{LiCl}$  composite measured at 171 °C.  $\text{BH}_4^-$  sites in  $\text{NaY}(\text{BH}_4)_2\text{Cl}_2$  are partially occupied by  $\text{Cl}^-$ , leading to composition:  $\text{NaYCl}_{2.18}(\text{BH}_4)_{1.82}$ .

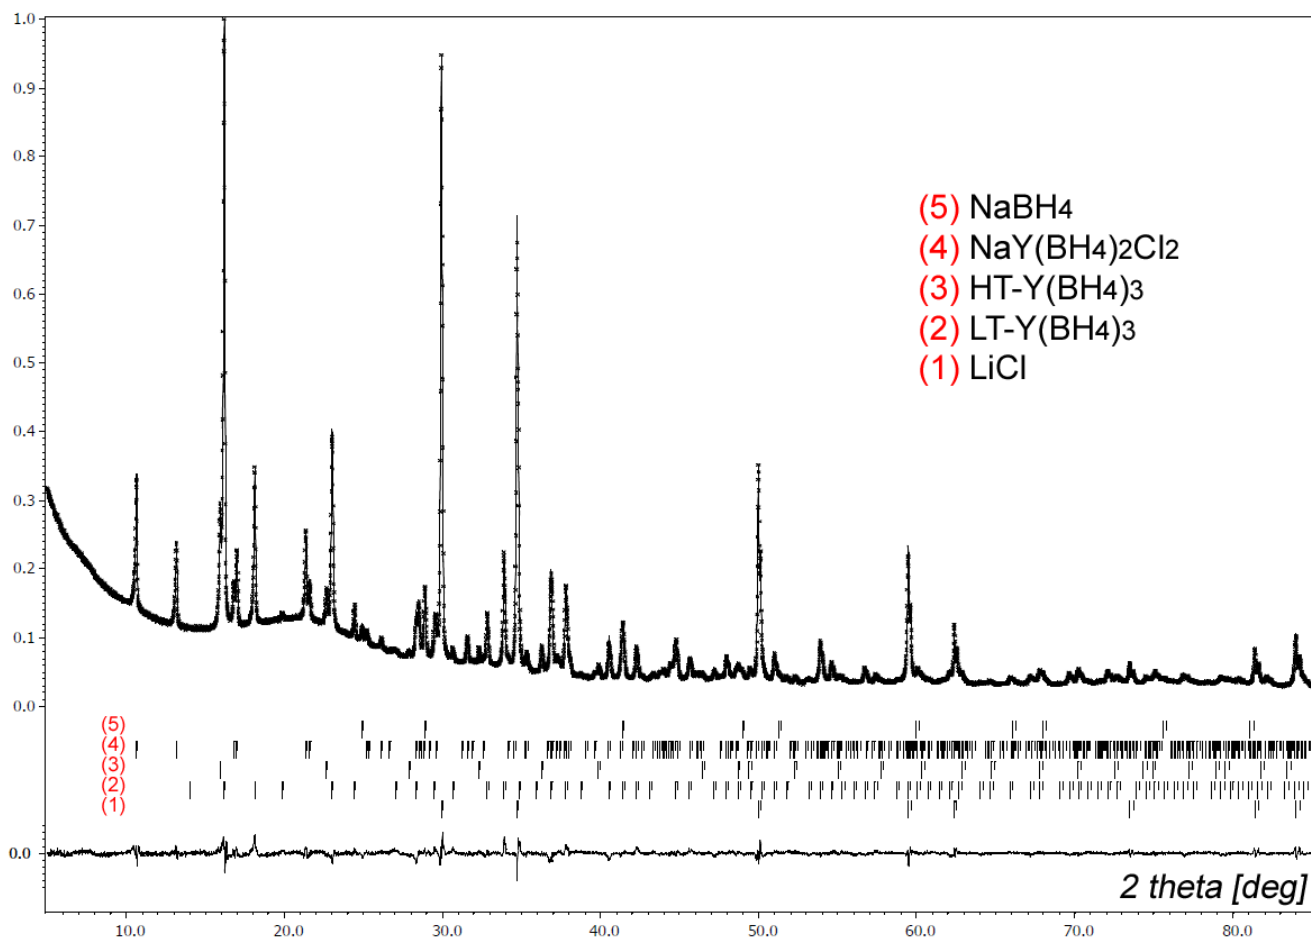

Figure S20. Rietveld plot of  $Y(BH_4)_3 + NaBH_4 + 3 LiCl$  composite heated to  $200\text{ }^\circ\text{C}$  ( $5\text{ K/min}$ ) and rapidly quenched ( $50\text{ K/min}$ ); PXD measured at RT.  $BH_4^-$  sites in  $NaY(BH_4)_2Cl_2$  are partially occupied by  $Cl^-$ , leading to composition:  $NaYCl_{2.09}(BH_4)_{1.91}$ . Please, note the minor  $Cl$  substitution degree, which is probably due to shorter exposition to high temperature than in case of the sample measured at  $171\text{ }^\circ\text{C}$ .

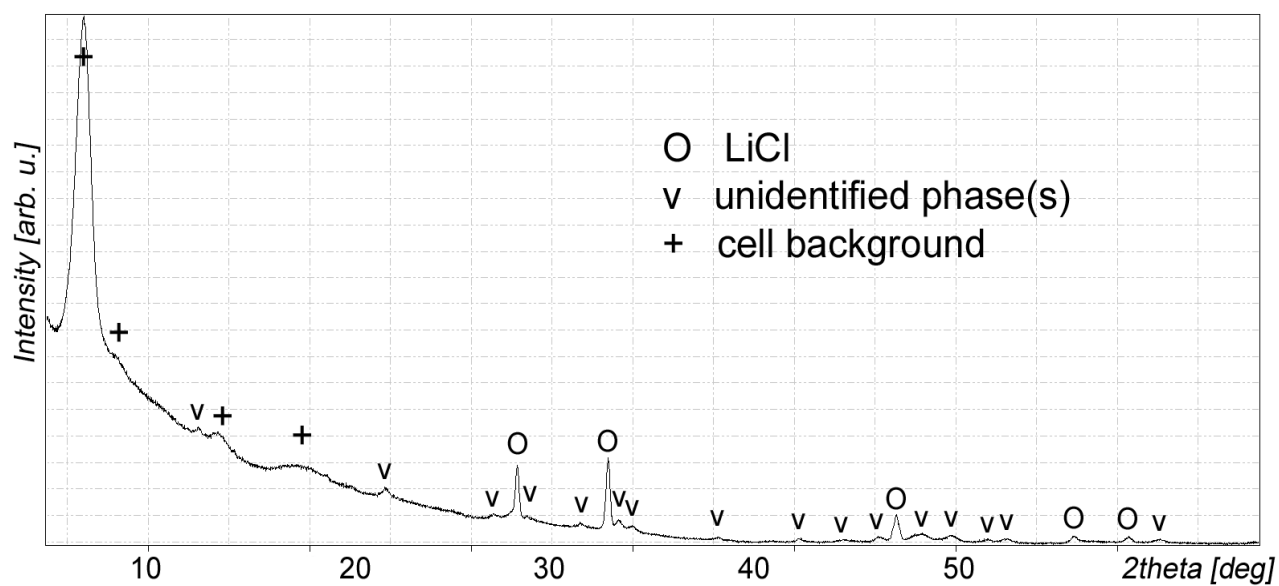

Figure S21. PXD pattern of  $Y(BH_4)_3 + NaBH_4 + 3 LiCl$  composite measured at 400 °C. The reflexes originating from the heating cell have been marked.

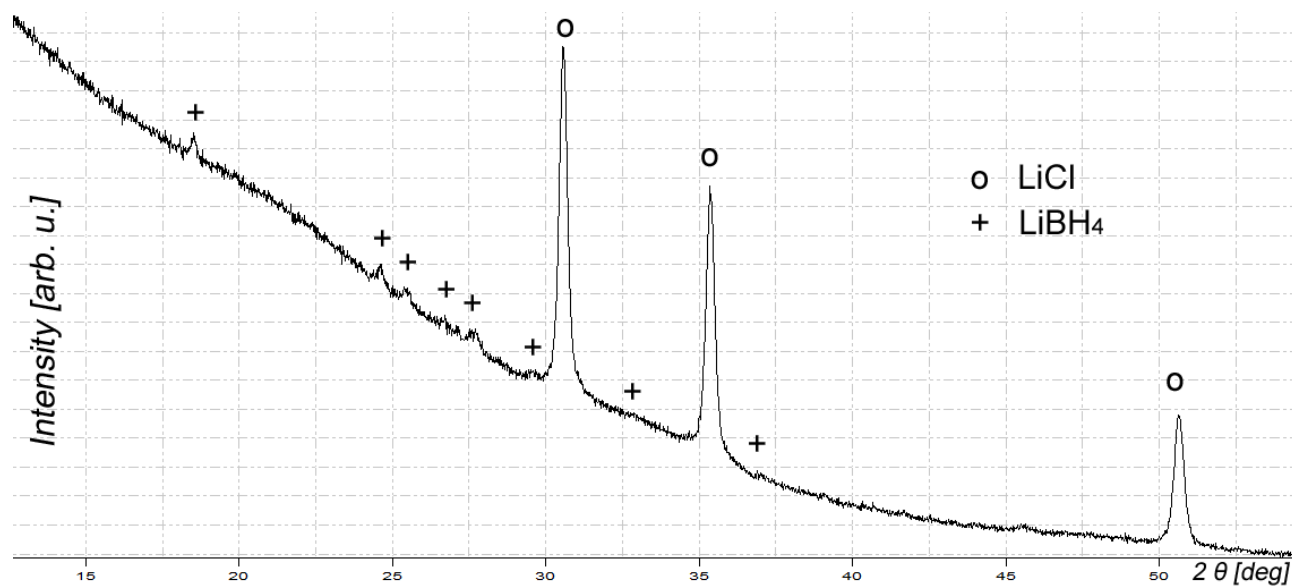

Figure S22. PXD pattern of  $Y(BH_4)_3 + LiBH_4 + 3 LiCl$  composite heated to 210 °C and quickly quenched to room temperature. Measured at ambient conditions.



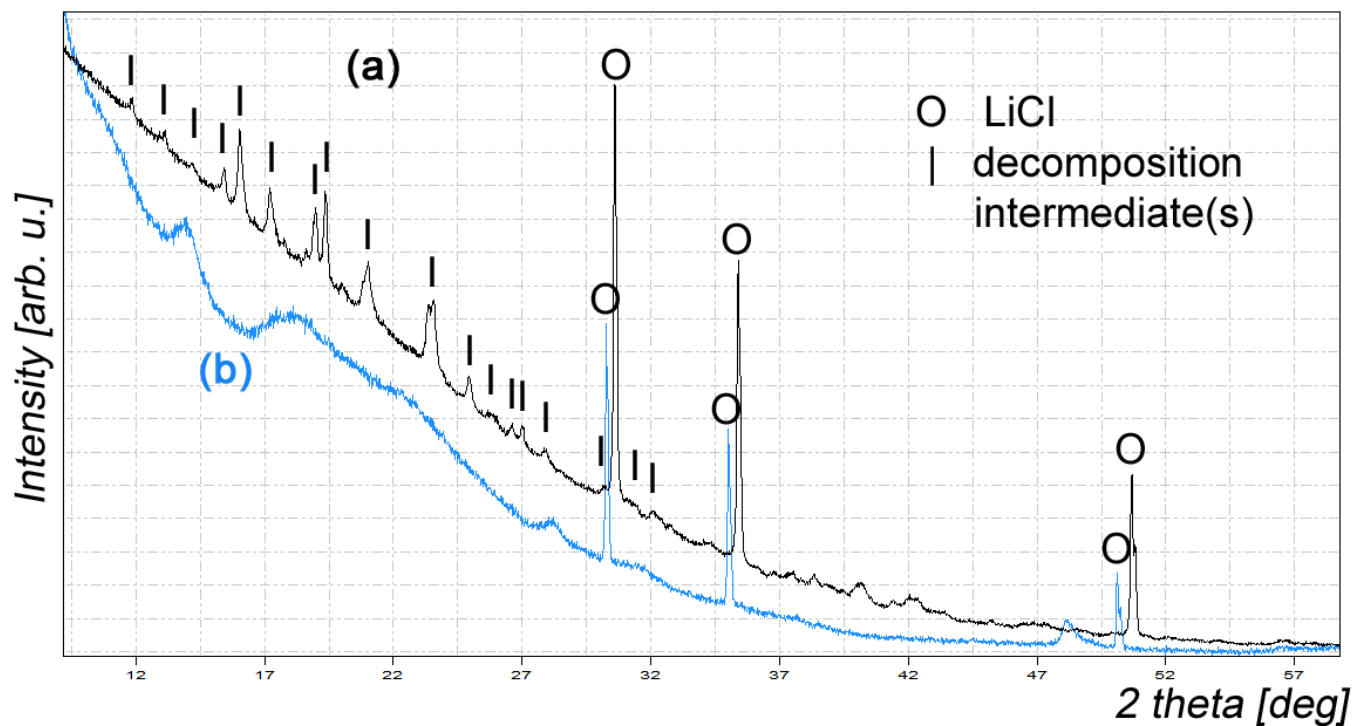

Figure S23. PXD pattern of  $KY(BH_4)_3 + 3 LiCl$ : (a) sample heated to  $210\text{ }^\circ\text{C}$  and quickly quenched to room temperature (black, top curve), measured for 17 h at room temperature; (b) measured at  $200\text{ }^\circ\text{C}$  for 5.5 h. In (b) only the reflexes from the temperature cell (not marked) and those of LiCl are observed, while in (a) the reflexes from intermediate(s) appear. The intermediate phase has been detected in the samples heated to  $190 - 210\text{ }^\circ\text{C}$  and quenched rapidly to room temperature.

<sup>1</sup> T. J. Marks, and J. R. Kolb, *Vhem. Rev.*, **77** (1977) 263.

<sup>2</sup> FTIR spectrum of  $YH_x$  was kindly provided by R. V. Genova, M.Sc., and K. J. Fijałkowski, M.Sc..
